# Supplementary material for: Features of Computer-Based Decision Aids: Systematic Review, Thematic Synthesis, and Meta-Analyses
Source: PubMed Central journal article supplement (PMC4748141; doi:10.2196/jmir.4982), 2016-01-26
Supplement: jmir_v18i1e20_app2.pdf [file jmir_v18i1e20_app2.pdf]

## Multimedia Appendix 2. Information about studies included in the systematic review

| Author, Year (Country)<br>Development manuscript / link<br>to decision aid                                   | Study<br>design | Decision context                                      | Interventions<br>(Sample size)                                                      | Control<br>(Sample size)                              | Features being<br>tested (Types of<br>components)†                                                      | Quality of decision-making<br>outcome (SMDs provided for<br>RCTs reporting knowledge or<br>decisional conflict) |
|--------------------------------------------------------------------------------------------------------------|-----------------|-------------------------------------------------------|-------------------------------------------------------------------------------------|-------------------------------------------------------|---------------------------------------------------------------------------------------------------------|-----------------------------------------------------------------------------------------------------------------|
| <b>TREATMENT</b>                                                                                             |                 |                                                       |                                                                                     |                                                       |                                                                                                         |                                                                                                                 |
| <b>Akl, 2007 [32]</b><br>(United States)                                                                     | Pre/post        | Chronic obstructive<br>pulmonary disease<br>treatment | Computer-based decision aid<br>(N=8)                                                | Baseline measures                                     | CC(abcd), T(c),<br>PN(b), EVC(c), F(d)                                                                  | Knowledge<br>Decisional conflict                                                                                |
| <b>Berman, 2011 [33]</b><br>(United States)                                                                  | Pre/post        | Abdominal aortic<br>aneurysm treatment                | Computer-based decision aid<br>(N=12)                                               | Baseline measures                                     | CC(bc), T(b), PN(a),<br>F(b), SS(bc)                                                                    | Knowledge<br>Decisional conflict                                                                                |
| <b>*Berry, 2013 [34]</b><br>(United States)<br><i>Berry, 2010 [35]</i>                                       | RCT             | Prostate cancer<br>treatment                          | Web-based decision aid +<br>usual patient education + web<br>links (n=218)          | Usual patient education<br>+ web links (n=182)        | CC(a), T(abc),<br>PN(b), F(f), SS(c)                                                                    | Decisional conflict (SMD=0.08)<br>Decisional certainty                                                          |
| <b>Brink, 2000<sup>a</sup> [36]</b><br>(United States)                                                       | Pre/post        | Prostate cancer<br>treatment                          | CD-ROM decision aid (N=43)                                                          | Baseline measures                                     | CC(ab), T(b), PN(a),<br>EVC(ac), F(d),<br>SS(b)                                                         | Knowledge<br>Decisional self-efficacy                                                                           |
| <b>*Davison, 2007 [31]</b><br>(Canada)                                                                       | RCT             | Prostate cancer<br>treatment                          | Tailored risk summary +<br>videotape + written<br>information package (n=148)       | Videotape + written<br>information package<br>(n=145) | T(bc), F(f)                                                                                             | Decisional conflict (SMD=0.04)<br>Satisfaction with decision making                                             |
| <b>*de Achaval, 2012 [37]</b><br>(United States)                                                             | RCT             | Knee osteoarthritis<br>treatment                      | 1: Videobooklet + values<br>clarification exercise (n=69)<br>2: Videobooklet (n=70) | Educational booklet<br>(n=69)                         | 1: PN(a), EVC(cd),<br>F(cf)<br>2: PN(a)                                                                 | Decisional conflict (SMD=0.37)                                                                                  |
| <b>Deyo, 2000<sup>b</sup> [38]</b><br>(United States)<br><i>Spunt, 1996 [39]</i><br><i>Phelan, 2001 [40]</i> | RCT             | Back pain treatment                                   | Videodisc + booklet (n=190)                                                         | Booklet (n=203)                                       | CC(abc), T(ab),<br>PN(a), F(f), SS(c)                                                                   | Satisfaction with decision making                                                                               |
| <b>*Diefenbach, 2012 [30]</b><br>(United States)<br><i>Diefenbach, 2004 [41]</i>                             | RCT             | Prostate cancer<br>treatment                          | Computer-based decision aid<br>(n=53)                                               | Standard brochures<br>(n=19)                          | CC(ab), T(ab[c] <sup>+</sup> ),<br>PN(a), EVC(b,<br>unclear), F(af),<br>SS(c)<br>*sometimes<br>included | Decisional conflict (SMD=0.62)                                                                                  |
| <b>*Feldman-Stewart, 2012 [42]</b><br>(Canada)<br><i>Feldman-Stewart, 2006 [43]</i>                          | RCT             | Prostate cancer<br>treatment                          | Computer-based decision aid<br>with values clarification<br>(n=69)                  | Computer-based<br>decision aid (n=65)                 | T(c), EVC(c), F(d)                                                                                      | Decisional conflict (SMD=0.10)                                                                                  |
| <b>Fraenkel, 2007 [44]</b><br>(United States)                                                                | RCT             | Knee pain treatment                                   | Computer-based decision aid<br>(n=44)                                               | Information pamphlet<br>(n=40)                        | EVC(d), F(cdf)                                                                                          | Decisional self-efficacy                                                                                        |
| <b>Fraenkel, 2012 [45]</b><br>(United States)                                                                | Pre/post        | Rheumatoid arthritis<br>treatment                     | Web-based decision aid<br>(N=104)                                                   | Baseline measures                                     | CC(abc), EVC(c),<br>F(bd)                                                                               | Knowledge<br>Decisional conflict                                                                                |
| <b>Heller, 2008 [46]</b><br>(United States)                                                                  | RCT             | Breast cancer<br>treatment                            | CD-ROM decision aid (n=67)                                                          | Usual care (n=66)                                     | CC(a), T(c), PN(a),<br>SS(c)                                                                            | Knowledge (Insufficient data to<br>calculate SMD)<br>Satisfaction with decision making                          |

|                                                                                                                                                      |          |                                        |                                                                                                    |                                                                        |                                                 |                                                                                                                     |
|------------------------------------------------------------------------------------------------------------------------------------------------------|----------|----------------------------------------|----------------------------------------------------------------------------------------------------|------------------------------------------------------------------------|-------------------------------------------------|---------------------------------------------------------------------------------------------------------------------|
| <b>Jibaja-Weiss, 2006<sup>c</sup> [47]</b><br>(United States)<br><i>Development manuscript not accessible</i>                                        | Pre/post | Breast cancer treatment                | Computer-based decision aid (N=44)                                                                 | Baseline measures                                                      | CC(abc), T(abc), PN(ab), EVC(bc), F(f), SS(abc) | Decisional conflict                                                                                                 |
| <b>*Jibaja-Weiss, 2011<sup>c</sup> [48]</b><br>(United States)<br><i>Jibaja-Weiss, 2006 [47]</i><br><i>Link was updated; not used in abstraction</i> | RCT      | Breast cancer treatment                | Computer-based decision aid (n=44)                                                                 | Usual care (n=39)                                                      | CC(abc), T(abc), PN(ab), EVC(bc), F(f), SS(abc) | Knowledge (SMD=0.75)<br>Decisional conflict (SMD=0.25)<br>Satisfaction with decision making<br>Decisional certainty |
| <b>Liao, 1996<sup>d</sup> [49]</b><br>(United States)                                                                                                | Pre/post | Ischemic heart disease treatment       | Videodisc decision aid (N=60)                                                                      | Baseline measures                                                      | CC(ab), T(b), PN(a)                             | Decisional certainty                                                                                                |
| <b>Maslin, 1998 [50]</b><br>(United Kingdom)                                                                                                         | RCT      | Breast cancer treatment                | Videodisc (n=51)                                                                                   | Usual care (n=49)                                                      | CC(c), T(ab), SS(c)                             | Satisfaction with decision making                                                                                   |
| <b>Molenaar, 2001 [51]</b><br>(Netherlands)                                                                                                          | RCT      | Breast cancer treatment                | CD-ROM decision aid (n=87)                                                                         | Usual care (n=72)                                                      | CC(abcd), PN(a), SS(ac)                         | Satisfaction with decision making                                                                                   |
| <b>Morgan, 2000<sup>d</sup> [52]</b><br>(Canada)<br><i>Liao, 1996 [49]</i>                                                                           | RCT      | Ischemic heart disease treatment       | Videodisc (n=90)                                                                                   | Usual care (n=97)                                                      | CC(ab), T(ab), PN(a), F(f), SS(c)               | Knowledge (Insufficient data to calculate SMD)<br>Satisfaction with decision making                                 |
| <b>*Murray, 2001 [53]</b><br>(United Kingdom)<br><i>Clinician guide not accessible</i>                                                               | RCT      | Menopausal symptom treatment           | Videodisc decision aid + booklet (n=94)                                                            | Usual care (n=96)                                                      | CC(bc), SS(c)                                   | Decisional conflict (SMD=0.54)<br>Decisional certainty                                                              |
| <b>Phelan, 2001<sup>b</sup> [40]</b><br>(United States)<br><i>Spunt, 1996 [39]</i>                                                                   | RCT      | Back pain treatment                    | Videodisc decision aid + booklet (n=41)                                                            | Booklet (n=49)                                                         | CC(abc), T(ab), PN(a), F(f)                     | Knowledge (Insufficient data to calculate SMD)                                                                      |
| <b>Piercy, 1999 [54]</b><br>(Canada)<br><i>Development manuscript not accessible</i>                                                                 | Pre/post | Benign prostatic hyperplasia treatment | Videodisc decision aid (N=635)                                                                     | Baseline measures                                                      | CC(c), T(ab), PN(a), F(f), SS(c)                | Decisional certainty                                                                                                |
| <b>*Protheroe, 2007 [55]</b><br>(United Kingdom)                                                                                                     | RCT      | Menorrhagia treatment                  | Computerized decision aid + written information (n=54 for knowledge; n=69 for decisional conflict) | Written information (n=54 for knowledge; n=69 for decisional conflict) | CC(bd), EVC(bcd), F(df)                         | Knowledge (SMD=0.57)<br>Decisional conflict (SMD=1.04)<br>Decisional certainty                                      |
| <b>*Rostom, 2002 [56]</b><br>(Canada)                                                                                                                | RCT      | Menopausal symptom treatment           | Computer-based decision aid (n=25)                                                                 | Audiobooklet decision aid (n=26)                                       | CC(b), T(unclear), F(b)                         | Knowledge (SMD=0.64)                                                                                                |
| <b>Sawka, 2011 [57]</b><br>(Canada)<br><i>Sawka, 2011 [58]</i>                                                                                       | Pre-post | Papillary thyroid cancer treatment     | Web-based decision aid (N=50)                                                                      | Baseline measures                                                      | CC(bcd), SS(a)                                  | Knowledge                                                                                                           |
| <b>*Sawka, 2012 [59]</b><br>(Canada)<br><i>Sawka, 2011 [58]</i>                                                                                      | RCT      | Papillary thyroid cancer treatment     | Web-based decision aid (n=37)                                                                      | Usual care (n=37)                                                      | CC(bcd), SS(a)                                  | Knowledge (SMD=1.88)<br>Decisional conflict (SMD=1.48)<br>Decisional certainty                                      |
| <b>*Schapira, 2007 [60]</b><br>(United States)                                                                                                       | RCT      | Menopausal symptom treatment           | Computer-based decision aid (n=85)                                                                 | Printed pamphlet (n=86)                                                | CC(ad), T(ab), PN(a)                            | Knowledge (SMD=-0.15)<br>Decisional conflict (SMD=0.07)<br>Satisfaction with decision making                        |
| <b>*Simon, 2012 [61]</b><br>(Germany)                                                                                                                | RCT      | Depression or back pain treatment      | Web-based decision aid (n=308)                                                                     | Static patient information (n=349)                                     | CC(bc), T(abc), SS(c)                           | Knowledge (SMD=0.23)<br>Decisional conflict (SMD=0.24)                                                              |

|                                                                                                                                                                         |          |                                                                                                               |                                                                                                                                                                            |                                                                   |                                               |                                                                                                                       |
|-------------------------------------------------------------------------------------------------------------------------------------------------------------------------|----------|---------------------------------------------------------------------------------------------------------------|----------------------------------------------------------------------------------------------------------------------------------------------------------------------------|-------------------------------------------------------------------|-----------------------------------------------|-----------------------------------------------------------------------------------------------------------------------|
| <b>Sivell, 2012 [62]</b><br>(United Kingdom)<br><i>Sivell, 2012 [63]</i><br><i>Webpage data abstracted; however, link not currently accessible (update in progress)</i> | Pre/post | Breast cancer treatment                                                                                       | Web-based decision aid (n=45)                                                                                                                                              | Baseline measures (n=54)                                          | CC(abcd), PN(ab), EVC(c), F(df), SS(ac)       | Knowledge<br>Decisional certainty                                                                                     |
| <b>Spunt, 1996<sup>b</sup> [39]</b><br>(United States)                                                                                                                  | Pre/post | Back pain treatment                                                                                           | Videodisc decision aid (N=175)                                                                                                                                             | Baseline measures                                                 | CC(abc), T(ab), PN(a), F(f)                   | Decisional certainty                                                                                                  |
| <b>Taylor, 2010<sup>a</sup> [64]</b><br>(United States)                                                                                                                 | RCT      | Prostate cancer treatment                                                                                     | CD-ROM decision aid + decision tools (n=42)                                                                                                                                | CD-ROM decision aid (n=53)                                        | CC(b), T(bc), EVC(b)                          | Satisfaction with decision making                                                                                     |
| <b>*Thomson, 2007 [65]</b><br>(United Kingdom)<br><i>Thomson, 2002 [66]</i>                                                                                             | RCT      | Atrial fibrillation treatment                                                                                 | Computer-based decision aid (n=53)                                                                                                                                         | Paper guidelines (n=55)                                           | T(abc), EVC(c), F(def), SS(c)                 | Knowledge (SMD=0.06)<br>Decisional conflict (SMD=0.42)                                                                |
| <b>van Til, 2010 [67]</b><br>(Netherlands)                                                                                                                              | Pre/post | Ankle-foot impairment treatment after stroke or arm-hand function treatment after cervical spinal cord injury | Web-based decision aid (n=39 for stroke; n=38 for spinal injury)                                                                                                           | Baseline measures                                                 | EVC(unclear)                                  | Knowledge<br>Decisional conflict                                                                                      |
| <b>RISK MANAGEMENT</b>                                                                                                                                                  |          |                                                                                                               |                                                                                                                                                                            |                                                                   |                                               |                                                                                                                       |
| <b>Hooker, 2011<sup>e</sup> [68]</b><br>(United States)<br><i>Kaufman, 2003 [69]</i>                                                                                    | RCT      | Breast cancer risk management                                                                                 | CD-ROM decision aid (n=96)                                                                                                                                                 | Usual care (n=108)                                                | CC(abc), T(abc), PN(a), EVC(cd), F(de), SS(c) | Decisional certainty                                                                                                  |
| <b>*Huyghe, 2009 [70]</b><br>(France)                                                                                                                                   | RCT      | Fertility risk management                                                                                     | Computer-based decision aid (n=10)                                                                                                                                         | Usual care (n=10)                                                 | CC(abd), EVC(c), F(b), SS(bc)                 | Knowledge (SMD=0.51)<br>Decisional conflict (SMD=1.23)                                                                |
| <b>*Montgomery, 2007 [71]</b><br>(United Kingdom)<br><i>Emmett, 2007 [72]</i>                                                                                           | RCT      | Vaginal birth after cesarean risk management                                                                  | 1: Computer-based decision aid (n=198 for knowledge and decisional conflict)<br>2: Computer-based information program (n=196 for knowledge; n=201 for decisional conflict) | Usual care (n=202 for knowledge; n=201 for decisional conflict)   | 1: CC(ab), EVC(c), F(df)<br>2: CC(abd)        | Knowledge (SMD=0.57)<br>Decisional conflict (SMD=0.28)<br>Satisfaction with decision making                           |
| <b>*Saver, 2007 [73]</b><br>(United States)                                                                                                                             | RCT      | Menopausal risk management                                                                                    | <i>RCT 1: Web-based decision aid (n=144)</i><br><i>RCT 2: Web-based decision aid (n=22)</i>                                                                                | <i>RCT 1: Brochure (n=199)</i><br><i>RCT 2: Usual care (n=19)</i> | CC(bd), EVC(b), SS(a)                         | Knowledge (SMD=0.49)<br>Decisional conflict (SMD=-0.02)<br>Satisfaction with decision making                          |
| <b>Schwartz, 2009<sup>e</sup> [74]</b><br>(United States)<br><i>Kaufman, 2003 [69]</i>                                                                                  | RCT      | Breast cancer risk management                                                                                 | CD-ROM decision aid (n=110)                                                                                                                                                | Usual care (n=114)                                                | CC(abc), T(abc), PN(a), EVC(cd), F(de), SS(c) | Decisional conflict (Insufficient data to calculate SMD)<br>Satisfaction with decision making<br>Decisional certainty |
| <b>*Wilkie, 2013 [75]</b><br>(United States)<br><i>Gallo, 2013 [76]</i>                                                                                                 | RCT      | Reproductive health risk management in people with sickle cell disease or trait                               | Web-based decision aid (n=114)                                                                                                                                             | Web-based e-Book (n=117)                                          | CC(b), T(ab), PN(ab), EVC(ef), SS(b)          | Knowledge (SMD=0.43)                                                                                                  |

| SCREENING                                                                                                                          |          |                             |                                                                                                                                                              |                                                           |                                                           |                                                                                                                         |
|------------------------------------------------------------------------------------------------------------------------------------|----------|-----------------------------|--------------------------------------------------------------------------------------------------------------------------------------------------------------|-----------------------------------------------------------|-----------------------------------------------------------|-------------------------------------------------------------------------------------------------------------------------|
| <b>Allen, 2009 [77]</b><br>(United States)                                                                                         | Pre/post | Prostate cancer screening   | Computer-based decision aid (N=107)                                                                                                                          | Baseline measures                                         | CC(abc), EVC(unclear), F(f)                               | Knowledge<br>Decisional conflict<br>Decisional certainty<br>Decisional self-efficacy                                    |
| <b>*Allen, 2010 [78]</b><br>(United States)<br><i>Development manuscript not accessible</i>                                        | RCT      | Prostate cancer screening   | Computer-based decision aid (n=291)                                                                                                                          | Usual care (n=334)                                        | CC(abc), T(ab), PN(b), EVC(c), F(ef)                      | Knowledge (SMD=0.19)<br>Decisional conflict (SMD=0.17)<br>Decisional certainty<br>Decisional self-efficacy              |
| <b>*Ellison, 2008 [79]</b><br>(United States)<br><i>Link no longer accessible</i>                                                  | RCT      | Prostate cancer screening   | Enhanced web-based decision aid (n=46)                                                                                                                       | Standard web-based decision aid (n=41)                    | CC(b), T(a), PN(a), SS(a)                                 | Knowledge (SMD=0.58)                                                                                                    |
| <b>Evans, 2010 [80]</b><br>(United Kingdom)<br><i>Link no longer accessible</i>                                                    | RCT      | Prostate cancer screening   | 1: Web-based decision aid (n=48)<br>2: Paper-based decision aid (n=57)                                                                                       | 1: Usual care (n=69)<br>2: Usual care at 6 months (n=100) | 1: PN(a), EVC(c)<br>2: no multimedia features             | Knowledge (Insufficient data to calculate SMD)<br>Decisional conflict (Insufficient data to calculate SMD)              |
| <b>*Frosch, 2008 [81]</b><br>(United States)                                                                                       | RCT      | Prostate cancer screening   | 1: Traditional decision aid + chronic disease trajectory model (n=152)<br>2: Chronic disease trajectory model (n=153)<br>3: Traditional decision aid (n=155) | Internet links (n=151)                                    | 1: PN(a), EVC(cd), SS(c)<br>2: EVC(cd)<br>3: PN(a), SS(c) | Knowledge (SMD=0.25)<br>Decisional conflict (SMD=0.07)                                                                  |
| <b>Green, 2004 [82]</b><br>(United States)<br><i>Development manuscript not accessible</i>                                         | RCT      | BRCA1/2 screening           | CD-ROM decision aid (n=56)                                                                                                                                   | Usual care (n=61)                                         | CC(a)                                                     | Knowledge (Insufficient data to calculate SMD)<br>Satisfaction with decision making                                     |
| <b>Kuppermann, 2009 [83]</b><br>(United States)                                                                                    | RCT      | Prenatal screening          | Computer-based decision aid (n=244)                                                                                                                          | Online educational booklet (n=252)                        | T(c, unclear), EVC(unclear), F(f)                         | Knowledge (Insufficient data to calculate SMD)<br>Decisional conflict (Insufficient data to calculate SMD)              |
| <b>Leung, 2004 [84]</b><br>(Hong Kong)                                                                                             | RCT      | Prenatal screening          | Computerized decision aid + video + information leaflet (n=99)                                                                                               | Video + information leaflet (n=101)                       | CC(bc), T(c)                                              | Decisional certainty                                                                                                    |
| <b>Lindblom, 2012 [85]</b><br>(Australia)<br><i>Link no longer accessible</i>                                                      | Pre/post | Colorectal cancer screening | Web-based decision aid (N=81)                                                                                                                                | Baseline measures                                         | T(c), F(b)                                                | Knowledge                                                                                                               |
| <b>*Manne, 2010 [86]</b><br>(United States)                                                                                        | RCT      | Lynch syndrome screening    | CD-ROM decision aid + education session (n=92)                                                                                                               | Education session only (n=95)                             | CC(bc)                                                    | Knowledge (SMD=1.09)<br>Decisional conflict (SMD=0.36)<br>Satisfaction with decision making<br>Decisional self-efficacy |
| <b>*Mathieu, 2010 [87]</b><br>(Australia)<br><a href="http://www.mammogram.med.usyd.edu.au">www.mammogram.med.usyd.edu.au</a> [88] | RCT      | Breast cancer screening     | Computer-based decision aid (n=113)                                                                                                                          | Usual care (n=189)                                        | CC(acd), PN(a), EVC(c), F(f)                              | Knowledge (SMD=0.59)<br>Decisional certainty                                                                            |

|                                                                                                                                                                   |          |                                                         |                                                                                                                 |                                                        |                                                                             |                                                                                                                     |
|-------------------------------------------------------------------------------------------------------------------------------------------------------------------|----------|---------------------------------------------------------|-----------------------------------------------------------------------------------------------------------------|--------------------------------------------------------|-----------------------------------------------------------------------------|---------------------------------------------------------------------------------------------------------------------|
| <b>Ruffin, 2007 [89]</b><br>(United States)<br><i>Link no longer accessible</i>                                                                                   | RCT      | Colorectal cancer screening                             | Computer-based decision aid (n=87)                                                                              | Standard website (n=87)                                | EVC(d), F(d), SS(c)                                                         | Decisional certainty                                                                                                |
| <b>Rupert, 2013 [90]</b><br>(United States)                                                                                                                       | Pre/post | Hereditary breast and ovarian cancer syndrome screening | Web-based decision aid (N=48)                                                                                   | Baseline measures                                      | CC(abd), T(ab), EVC(a), F(df), SS(c)                                        | Knowledge<br>Decisional self-efficacy                                                                               |
| <b>*Schroy, 2011 [91]</b><br>(United States)<br><i>www.yourdiseaserisk.wustl.edu [92]</i>                                                                         | RCT      | Colorectal cancer screening                             | 1: Computer-based decision aid + personalized risk assessment (n=223)<br>2: Computer-based decision aid (n=212) | Webpage (n=231)                                        | 1: CC(abc), T(ab), PN(a), EVC(d), SS(c)<br>2: CC(abc), PN(a), EVC(d), SS(c) | Knowledge (SMD=0.91)<br>Satisfaction with decision making                                                           |
| <b>*Volk, 2008 [93]</b><br>(United States)                                                                                                                        | RCT      | Prostate cancer screening                               | Computer-based decision aid (n=38 for low literacy; n=108 for high literacy)                                    | Audio-booklet (low literacy n=46; high literacy n=131) | CC(ab), T(a), PN(b), EVC(e), SS(a)                                          | Knowledge (Insufficient data to calculate SMD)<br>Decisional conflict (SMD=0.33)                                    |
| <b>PREVENTION</b>                                                                                                                                                 |          |                                                         |                                                                                                                 |                                                        |                                                                             |                                                                                                                     |
| <b>*Banegas, 2013 [94]</b><br>(United States)<br><i>Fagerlin, 2011 [95]</i>                                                                                       | RCT      | Breast cancer prevention                                | Web-based decision aid (n=690)                                                                                  | Usual care (n=160)                                     | T(ab), EVC(unclear)                                                         | Decisional conflict (SMD=0.56)<br>Decisional certainty                                                              |
| <b>*Ozanne, 2007 [96]</b><br>(United States)                                                                                                                      | RCT      | Breast cancer prevention                                | Computer-based decision aid (n=15)                                                                              | Usual care (n=15)                                      | T(ab)                                                                       | Knowledge (SMD=0.63)<br>Decisional conflict (SMD=0.78)<br>Satisfaction with decision making<br>Decisional certainty |
| <b>Sheridan, 2006<sup>f</sup> [97]</b><br>(United States)<br><i>Pignone, 2004 [98]</i><br><i>Link was updated; not used in abstraction</i>                        | RCT      | Coronary heart disease prevention                       | Web-based decision aid (n=41)                                                                                   | Risk factor list (n=34)                                | T(abc), F(f), SS(c)                                                         | Decisional certainty                                                                                                |
| <b>Sheridan, 2010<sup>f</sup> [99]</b><br>(United States)<br><i>Pignone, 2004 [98]</i><br><i>www.med-decisions.com/h2hv2 [100]</i>                                | RCT      | Coronary heart disease prevention                       | Web-based decision aid + values clarification (n=75)                                                            | Web-based decision aid (n=62)                          | EVC(cd), F(c)                                                               | Knowledge (Insufficient data to calculate SMD)<br>Decisional certainty<br>Decisional self-efficacy                  |
| <b>Sheridan, 2011<sup>f</sup> [101]</b><br>(United States)<br><i>Pignone, 2004 [98]</i><br><i>Sheridan, 2010 [99]</i><br><i>www.med-decisions.com/h2hv2 [100]</i> | RCT      | Coronary heart disease prevention                       | Web-based decision aid (n=77)                                                                                   | Risk factor list (n=77)                                | CC(cd), T(abc), EVC(cd), F(cf), SS(c)                                       | Decisional certainty                                                                                                |

\*Studies included in the meta-analysis; <sup>a-f</sup>Studies employing the same decision aids are denoted with alpha superscripts (a through f); it is important to note, however, that the studies may be testing different features of the decision aid (as determined by the control group) or updated versions of the same decision aid; †Legend for column: CC = content control (with types: a = navigation, b = clarity of information, c = optional information, d = access to external resources), T = tailoring (with types: a = demographics, b = clinical condition, c = values, preferences, and beliefs, d = knowledge deficits), PN = patient narratives (with types: a = patient stories, b = behavior modeling), EVC = explicit values clarification (with types: a = decision points, b = notebook, c = weighting exercises, d = trade-off exercises, e = social matching, f = personal reflection), F = feedback (with types: a = decision aid progress, b = knowledge, c = summary of preferences, d = optimal choice, e = decisional consistency, f = summary of decision aid activity), and SS = social support (with types: a = community support, b = integration of family, c = facilitation of shared decision making).
